# Supplementary material for: Preparation of oxygen-sensitive proteins for high-resolution cryoEM structure determination using (an)aerobic blot-free vitrification
Source: PubMed Central journal article supplement (PMC11291078; doi:10.1101/2024.07.19.604374), 2024-07-22
Supplement: media-1.pdf [file media-1.pdf]

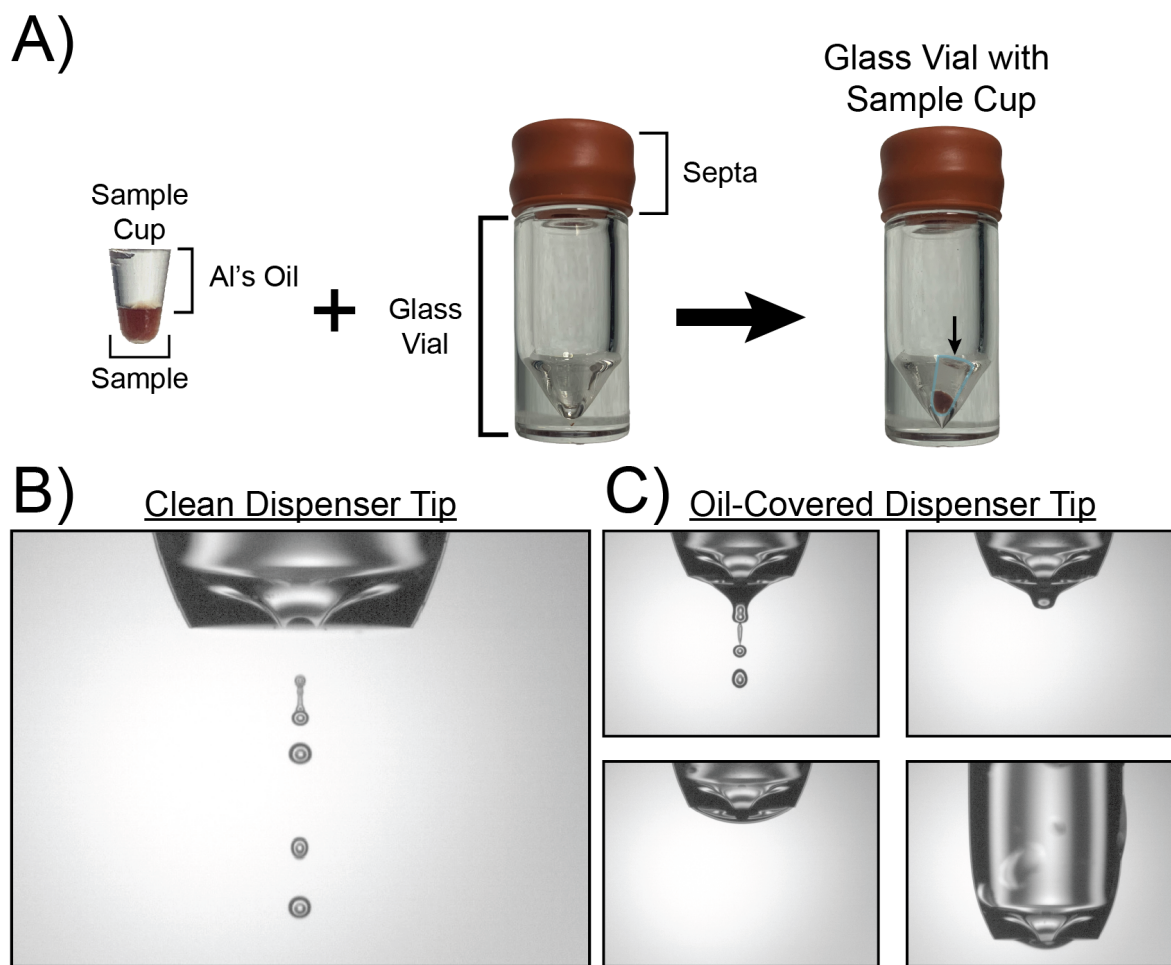

**Figure S1: Images of critical steps in the (an)aerobic workflow. A)** Images of a Hb sample in a chameleon sample cup with the protective Al's oil layer on top. The chameleon sample cup is prepared within an anaerobic environment and transferred into gas-tight glass vial and sealed with a rubber septum. **B-C** Images from the chameleon software displaying either a clean functioning dispenser tip (**B**) or a tip with residual oil on the outside (**C**). The residual oil can be removed using dispenser washing or wiping steps to yield a clean dispenser tip (**B**).

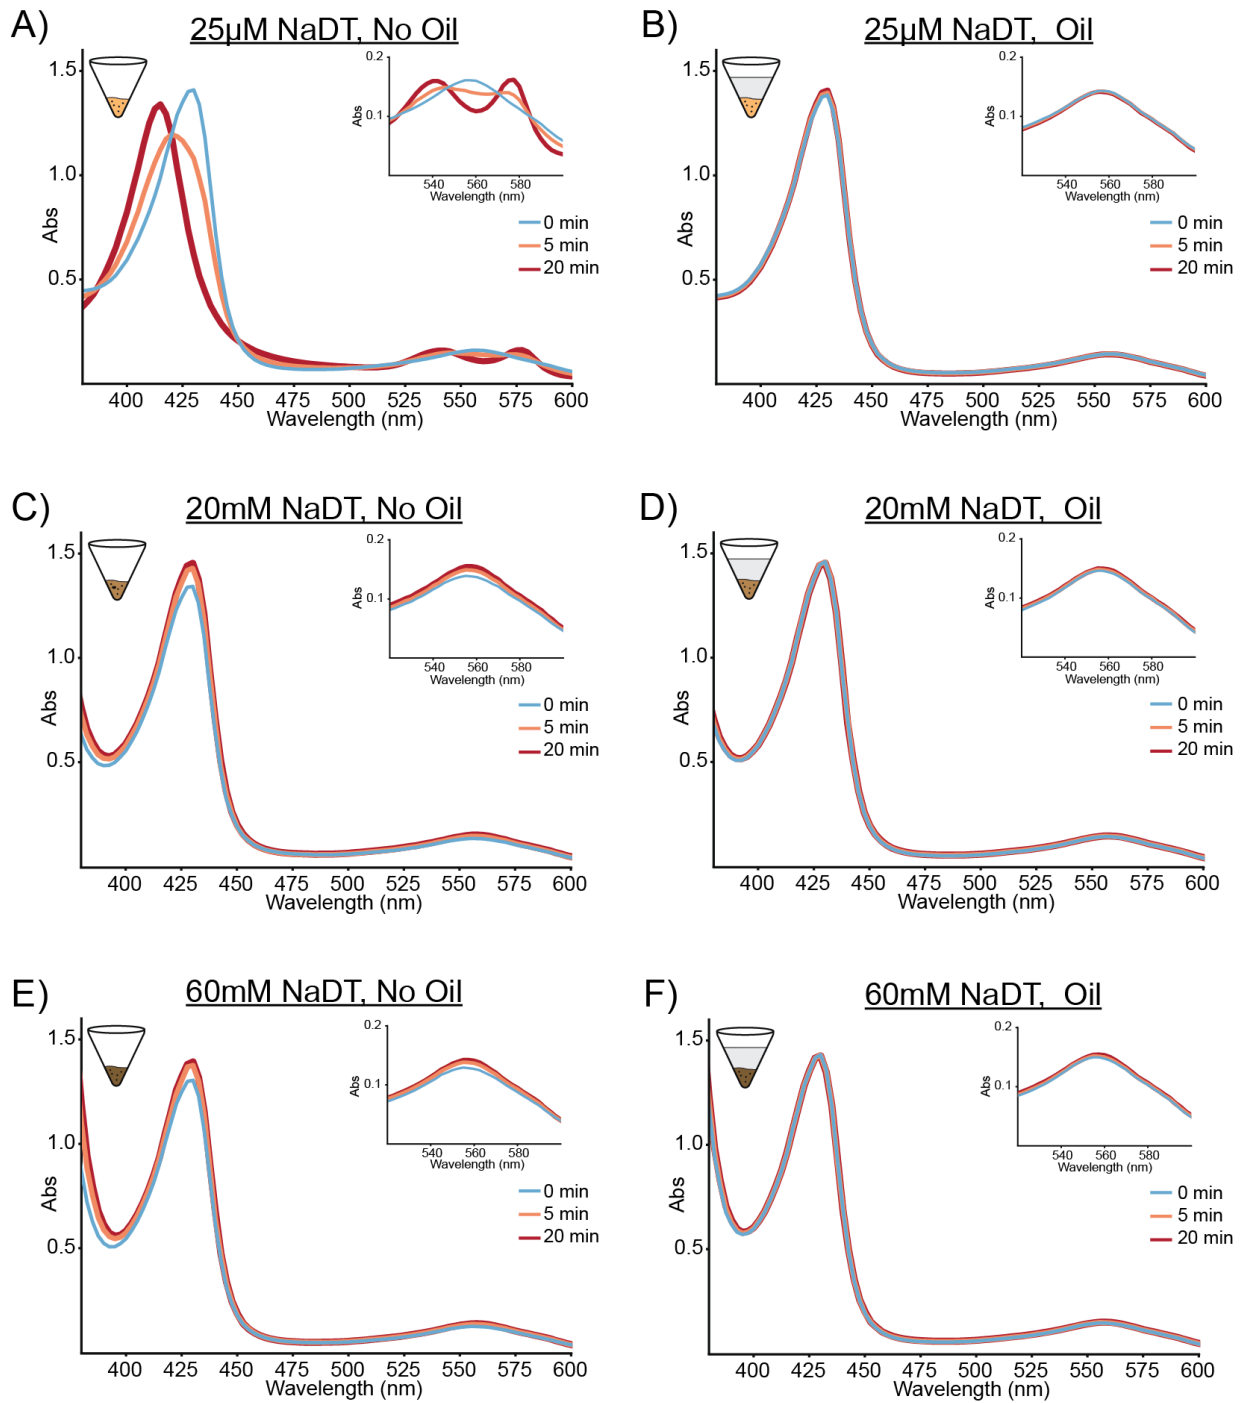

**Figure S2: UV-Vis-based oxygen perfusion assay using human deoxyHb under varying conditions.** For each sample, the anaerobic cuvette containing deoxyHb was opened to air and UV-Vis spectra were recorded from 350-600 nm over the course of 20 minutes. **A,B**) Timecourse of deoxyHb with 25  $\mu$ M NaDT in sample buffer without and with a protective oil layer, respectively. **C,D**) Timecourse of deoxyHb with 20 mM NaDT in sample buffer without and with a protective oil layer, respectively. **E,F**) Timecourse of deoxyHb with 25  $\mu$ M NaDT in sample buffer without and with a protective oil layer, respectively. For each assay, an inset of the 525-550 nm region is shown. For each assay, UV-Vis spectra at time 0 min (blue), 5 min (orange), and 20 min (red) are shown.

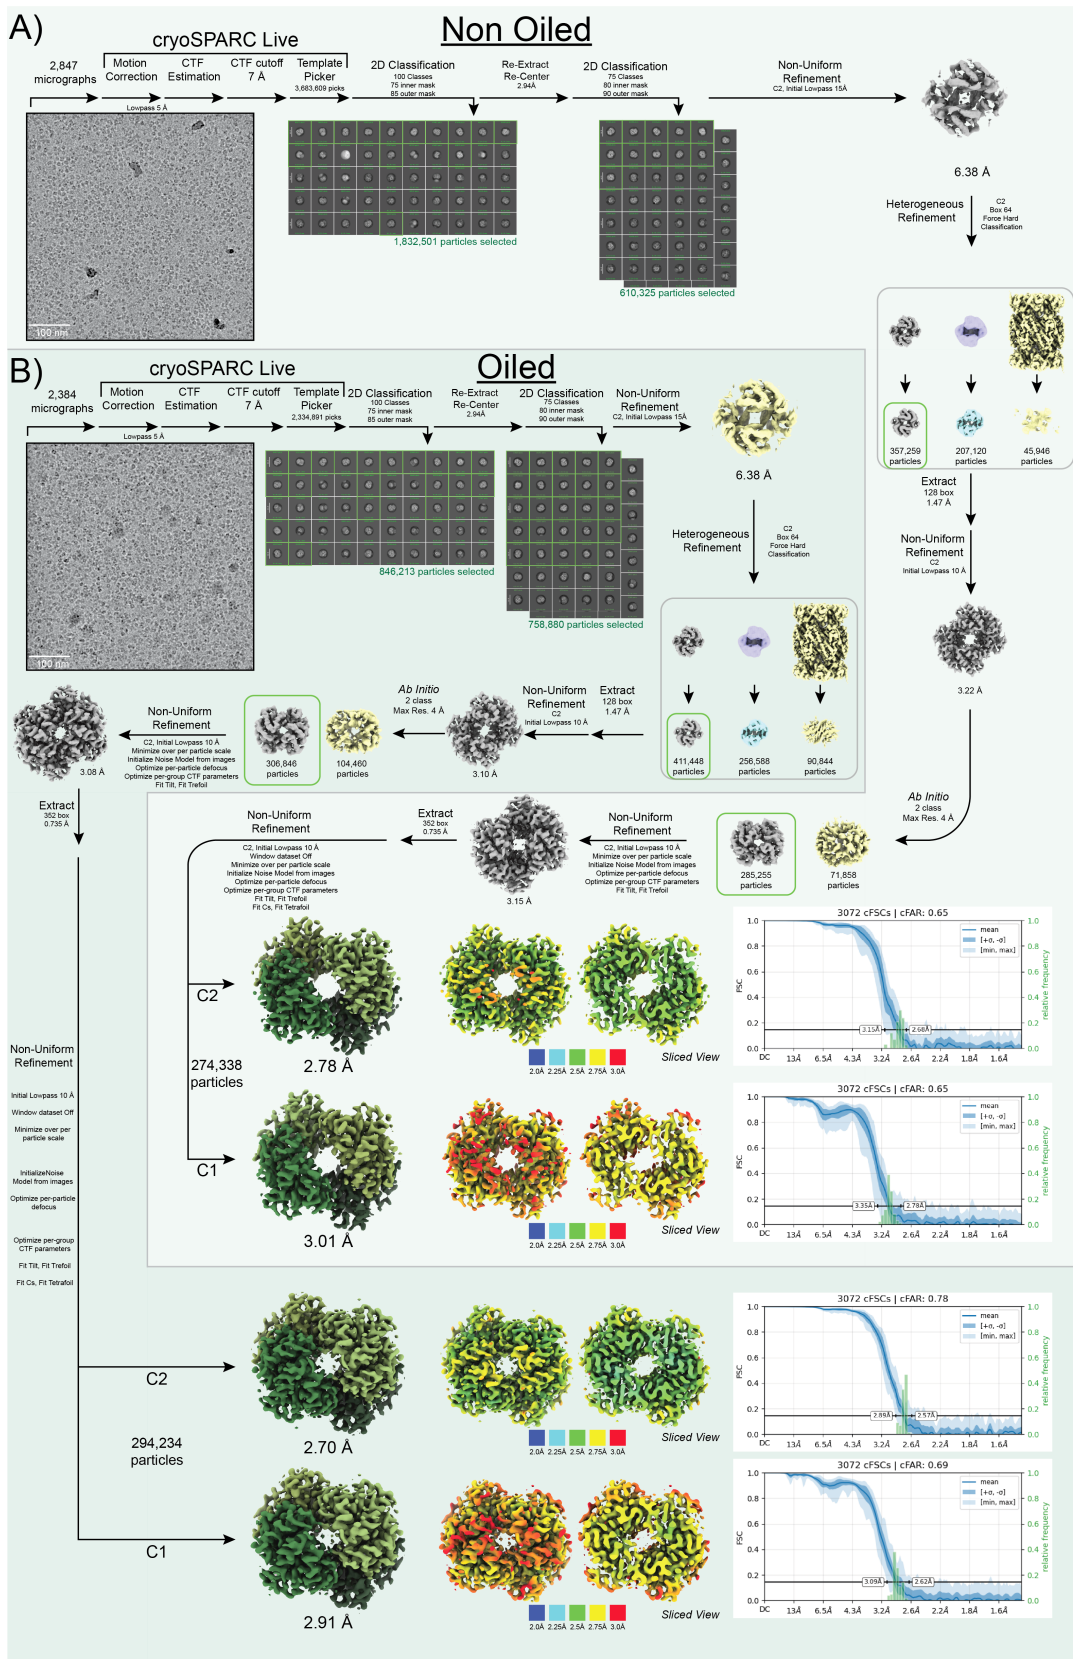

**Figure S3: CryoEM data processing workflow for non-oiled and oiled metHb structures.** A) Single-particle cryoEM data processing workflow for the 2.78 Å resolution non-oiled metHb structure. B) Single-particle cryoEM data processing workflow for the 2.71 Å resolution oiled metHb structure. 2,847 micrographs and 2,384 micrographs of non-oiled and oiled metHb, respectively, were collected and processed using similar strategies. Briefly, particle coordinates were obtained via template picking and extracted downsampled 4x prior to successive rounds of 2-D classification. Particles within the best classes were 3-D refined followed by a heterogeneous refinement using two Hb volumes and the 20S proteasome from *T. thermophilus* (EMDB-4877). Particles in the best class were carried downstream for 3-D refinement without downsampling with per-particle CTF and aberration refinements. For the final refinement, C1 and C2 symmetry were employed. Both non-oiled and oiled structures comprised similar final particle numbers, 275K versus 295K, respectively, and refined to similar FSC-estimated resolution with similar viewing distributions as estimated by 3-D FSC. Each of the final structures are colored by local resolution and the 3-D FSC plots are shown.

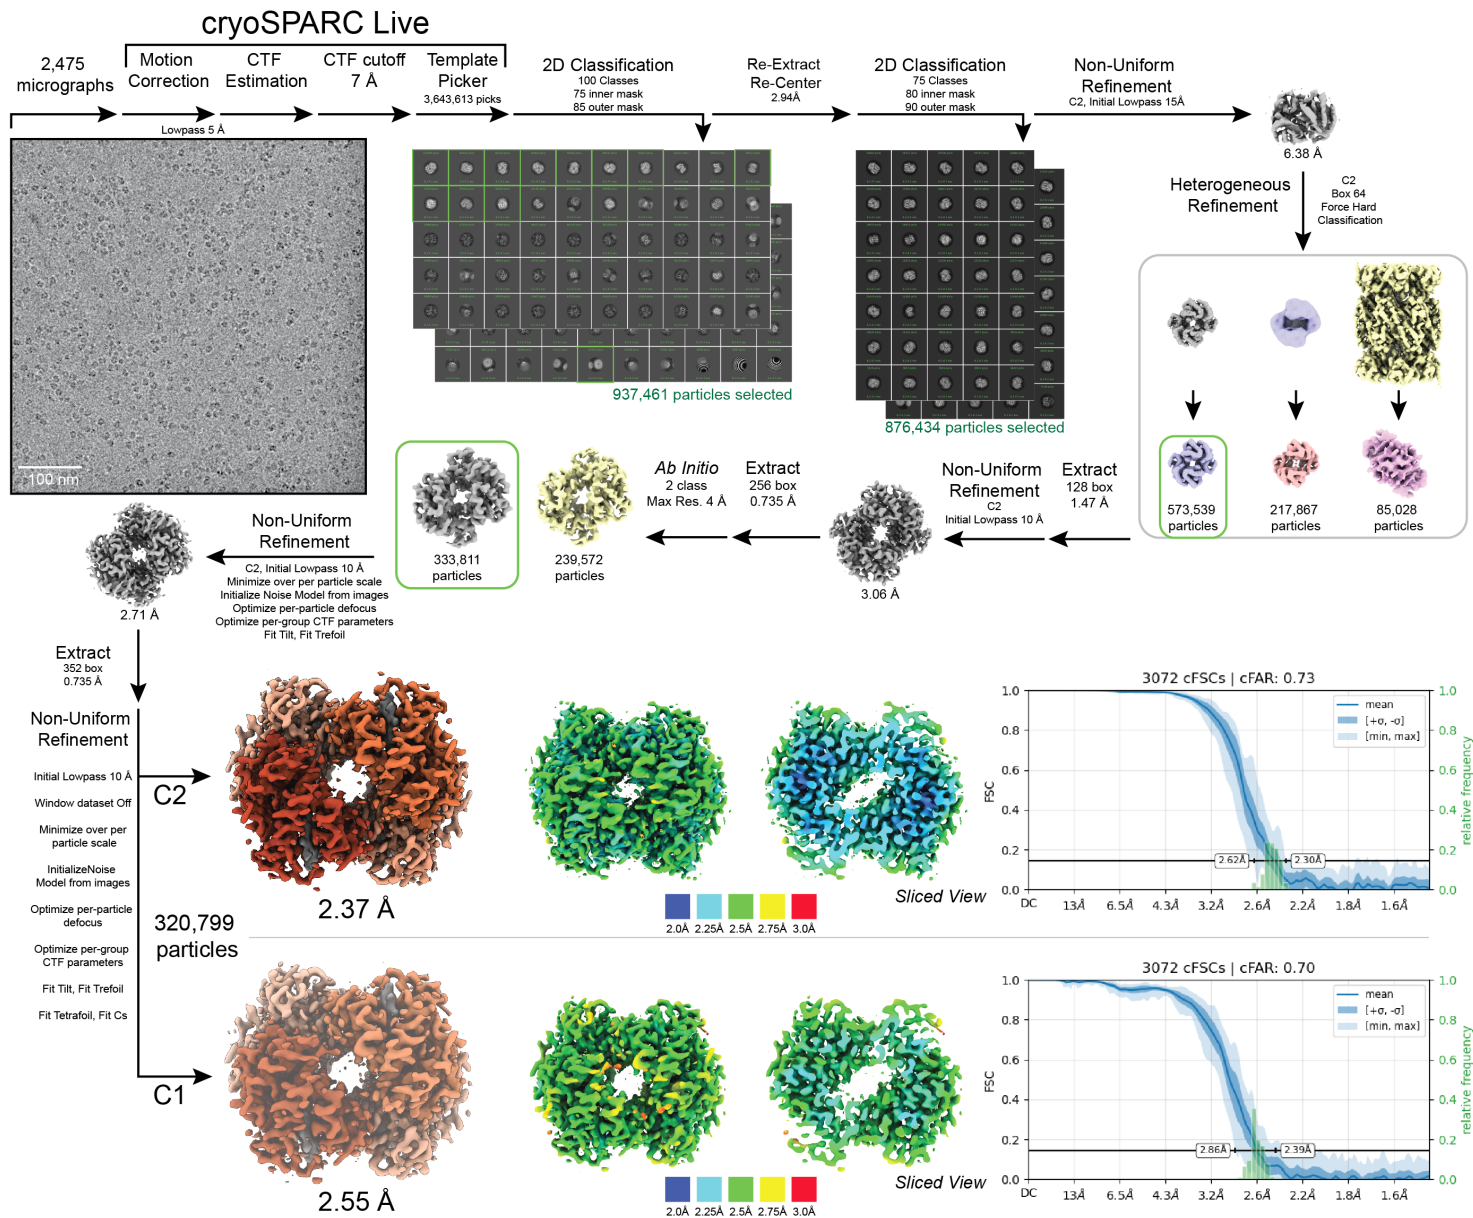

**Figure S4: CryoEM data processing workflow for the very low NaDT (25  $\mu$ M), oxyHb structure.** Single-particle cryoEM data processing workflow for the 2.37 Å resolution oxyHb structure that was obtained in 25  $\mu$ M NaDT under oil. 2,475 micrographs were collected and processed using a similar strategy as the metHb structures in Fig S3. Briefly, particle coordinates were obtained via template picking and extracted downsampled 4x prior to successive rounds of 2-D classification. Particles within the best classes were 3-D refined followed by a heterogeneous refinement using two Hb volumes and the 20S proteasome from *T. thermophilus* (EMDB-4877). Particles in the best class were carried downstream for 3-D refinement without downsampling with per-particle CTF and aberration refinements. For the final refinement, C1 and C2 symmetry were employed. Each of the final structures are colored by local resolution and the 3-D FSC plots are shown.

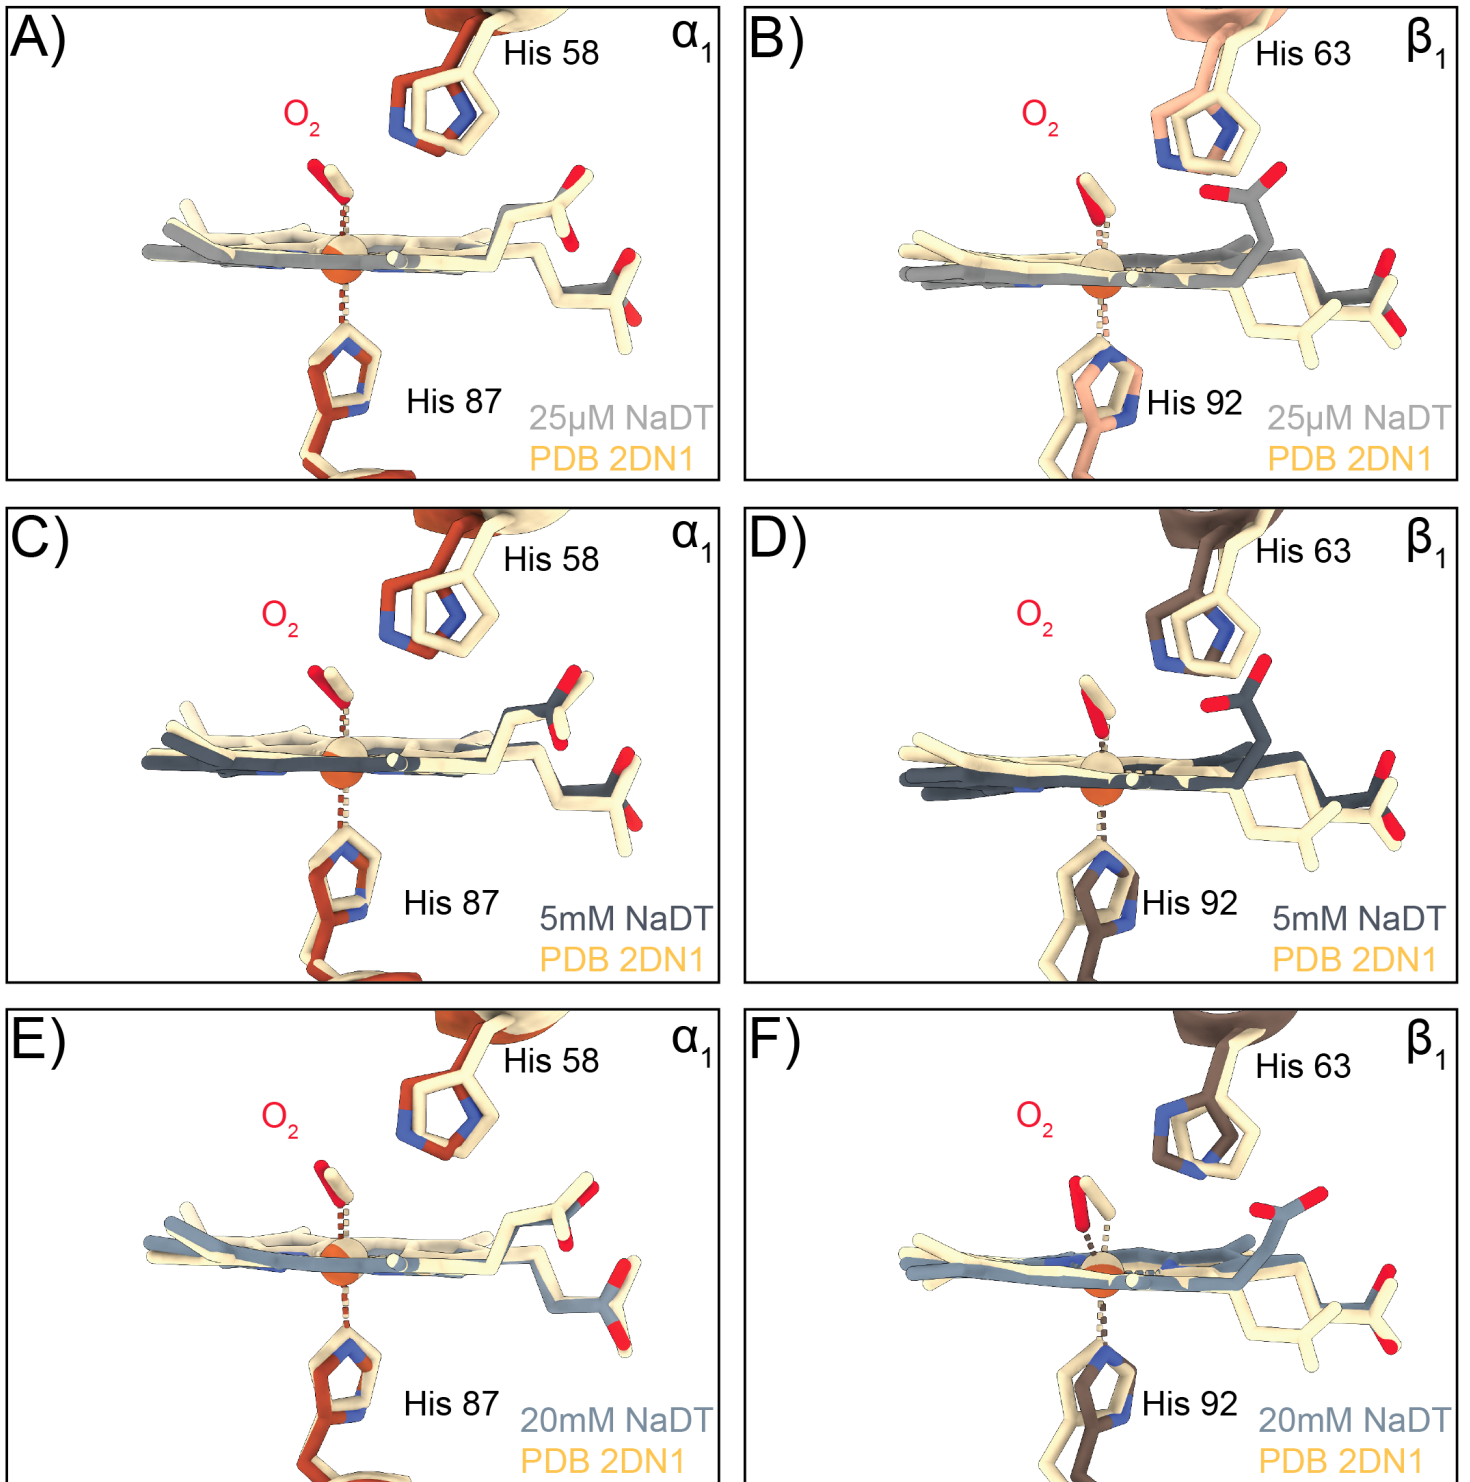

**Figure S5: Comparison of oxygen binding geometry in our oxyHb and partially-oxygenated Hb cryoEM structures vs oxyHb determined using X-ray crystallography structure (PDB: 2DN1).** **A-B)** The atomic models for the hemes of the  $\alpha_1$  subunit (**A**) and  $\beta_1$  subunit (**B**) (colored gray) and bound oxygen (colored red) overlapped with the heme and bound oxygen from the X-ray crystallography structure (PDB: 2DN1), shown in wheat detailing similar geometries **C-D)** The atomic models for the hemes of the  $\alpha_1$  subunit (**C**) and  $\beta_1$  subunit (**D**) (colored blue-gray) and bound oxygen (colored red) overlapped with the heme and bound oxygen from the X-ray crystallography structure (PDB: 2DN1), shown in wheat detailing similar geometries. The atomic models for  $\alpha_1$ H58,  $\alpha_1$ H87,  $\beta_1$ H63, and  $\beta_1$ H92 are also shown. **E-F)** The atomic models for the hemes of the  $\alpha_1$  subunit (**E**) and  $\beta_1$  subunit (**F**) (colored gray) and bound oxygen (colored wheat) overlapped with the heme and bound oxygen from the X-ray crystallography structure (PDB: 2DN1), shown in wheat detailing similar geometries. The atomic models for  $\alpha_1$ H58,  $\alpha_1$ H87,  $\beta_1$ H63, and  $\beta_1$ H92 are also shown.

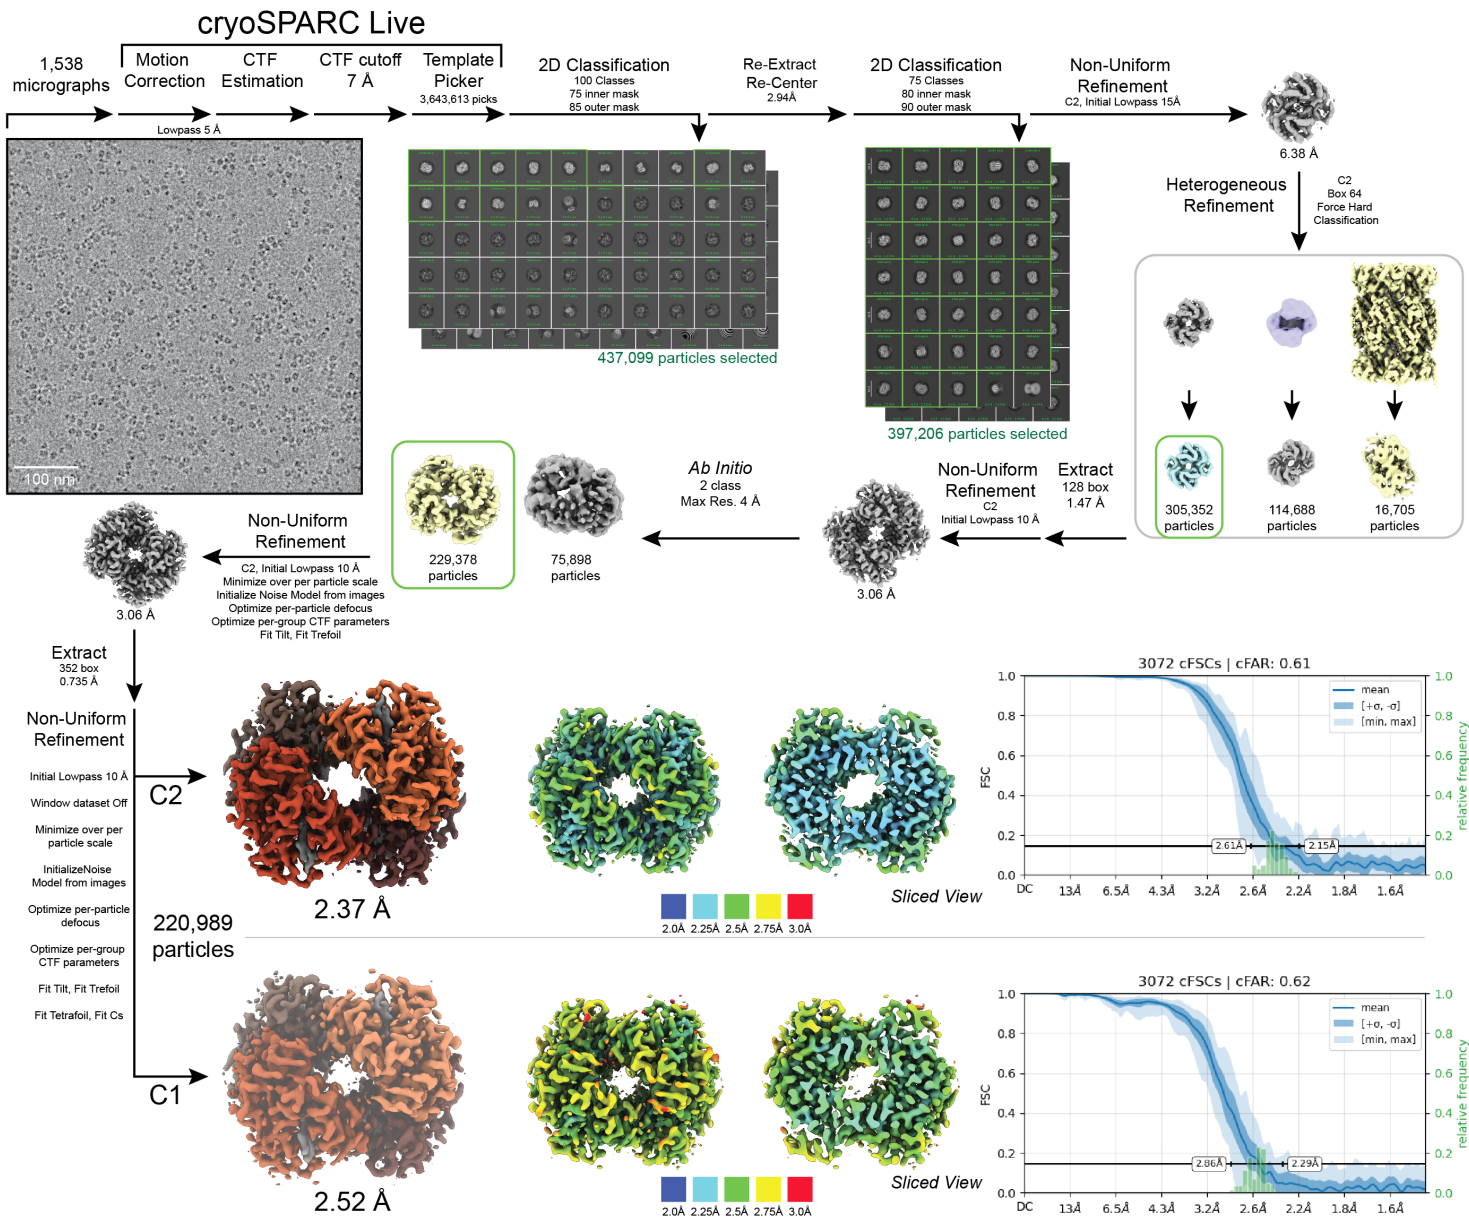

**Figure S6: CryoEM data processing workflow for the low NaDT (5 mM), oxyHb structure.** Single-particle cryoEM data processing workflow for the 2.37 Å resolution oxyHb structure that was obtained in 5 mM NaDT under oil. 1,538 micrographs were collected and processed using a similar strategy as the very low NaDT Hb structures in Fig S4. Briefly, particle coordinates were obtained via template picking and extracted downsampled 4x prior to successive rounds of 2-D classification. Particles within the best classes were 3-D refined followed by a heterogeneous refinement using two Hb volumes and the 20S proteasome from *T. thermophilus* (EMDB-4877). Particles in the best class were carried downstream for 3-D refinement without downsampling with per-particle CTF and aberration refinements. For the final refinement, C1 and C2 symmetry were employed. Each of the final structures are colored by local resolution and the 3-D FSC plots are shown.

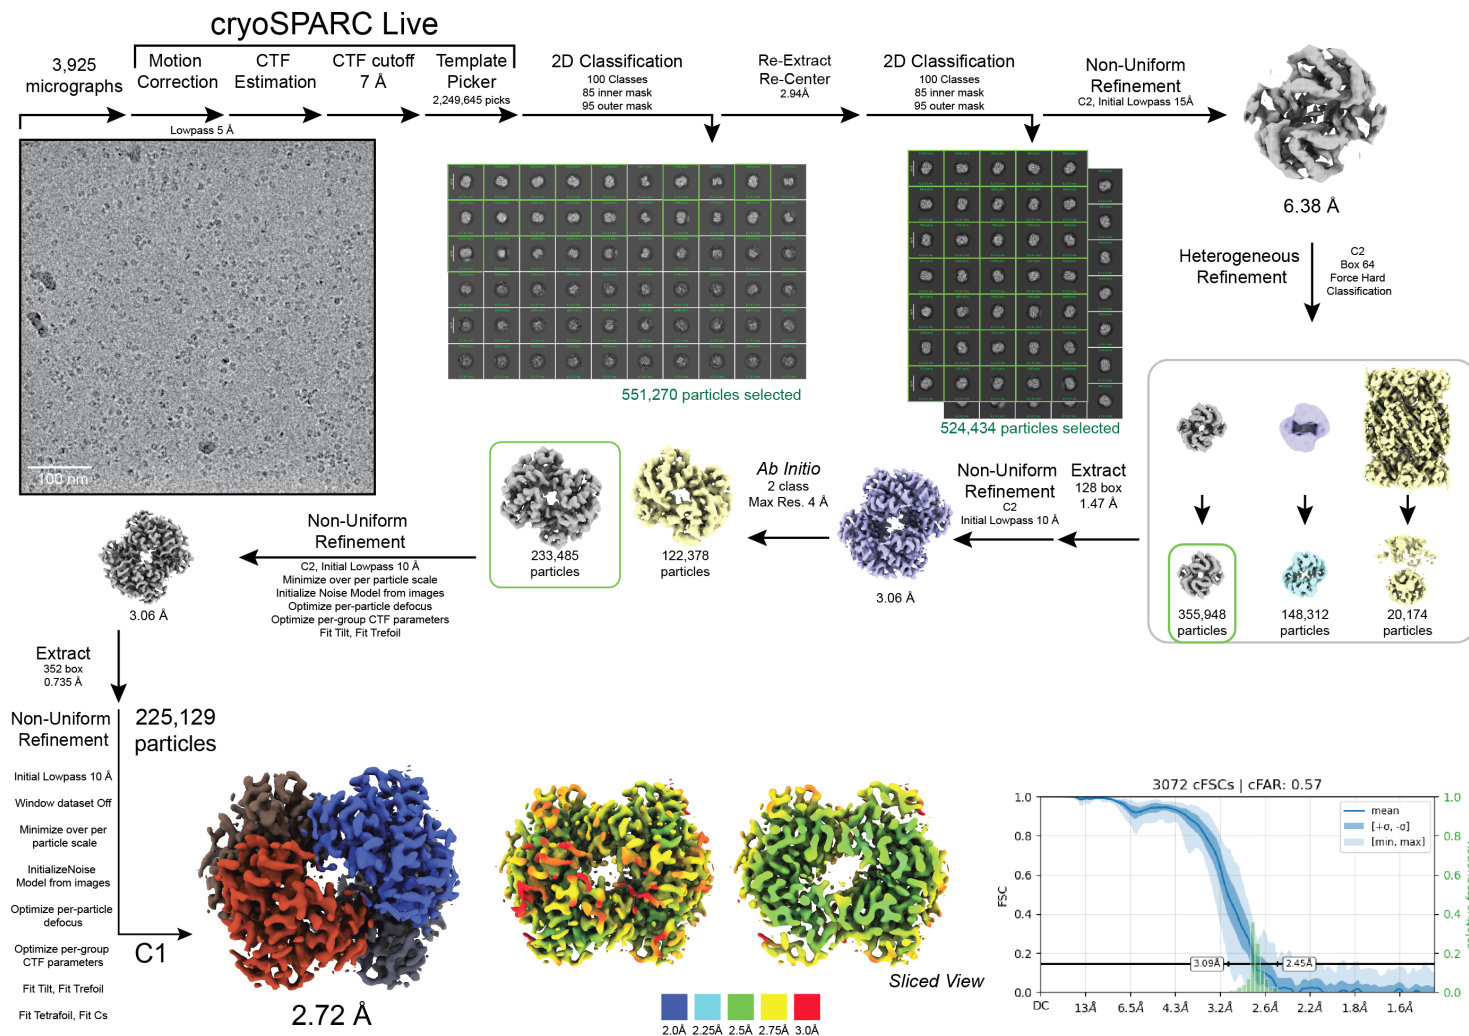

**Figure S7: CryoEM data processing workflow for the medium NaDT (20 mM), partially-oxygenated Hb structure.** Single-particle cryoEM data processing workflow for the 2.72 Å resolution partially-oxygenated (mixed) Hb structure that was obtained in 20 mM NaDT under oil. 3,925 micrographs were collected and processed using a similar strategy as the methHb structures in Fig S3. Briefly, particle coordinates were obtained via template picking and extracted downsampled 4x prior to successive rounds of 2-D classification. Particles within the best classes were 3-D refined followed by a heterogeneous refinement using two Hb volumes and the 20S proteasome from *T. thermophilus* (EMDB-4877). Particles in the best class were carried downstream for 3-D refinement without downsampling with per-particle CTF and aberration refinements. For the final refinement, C1 symmetry was employed. The final structure is colored by local resolution and the 3-D FSC plot is shown.

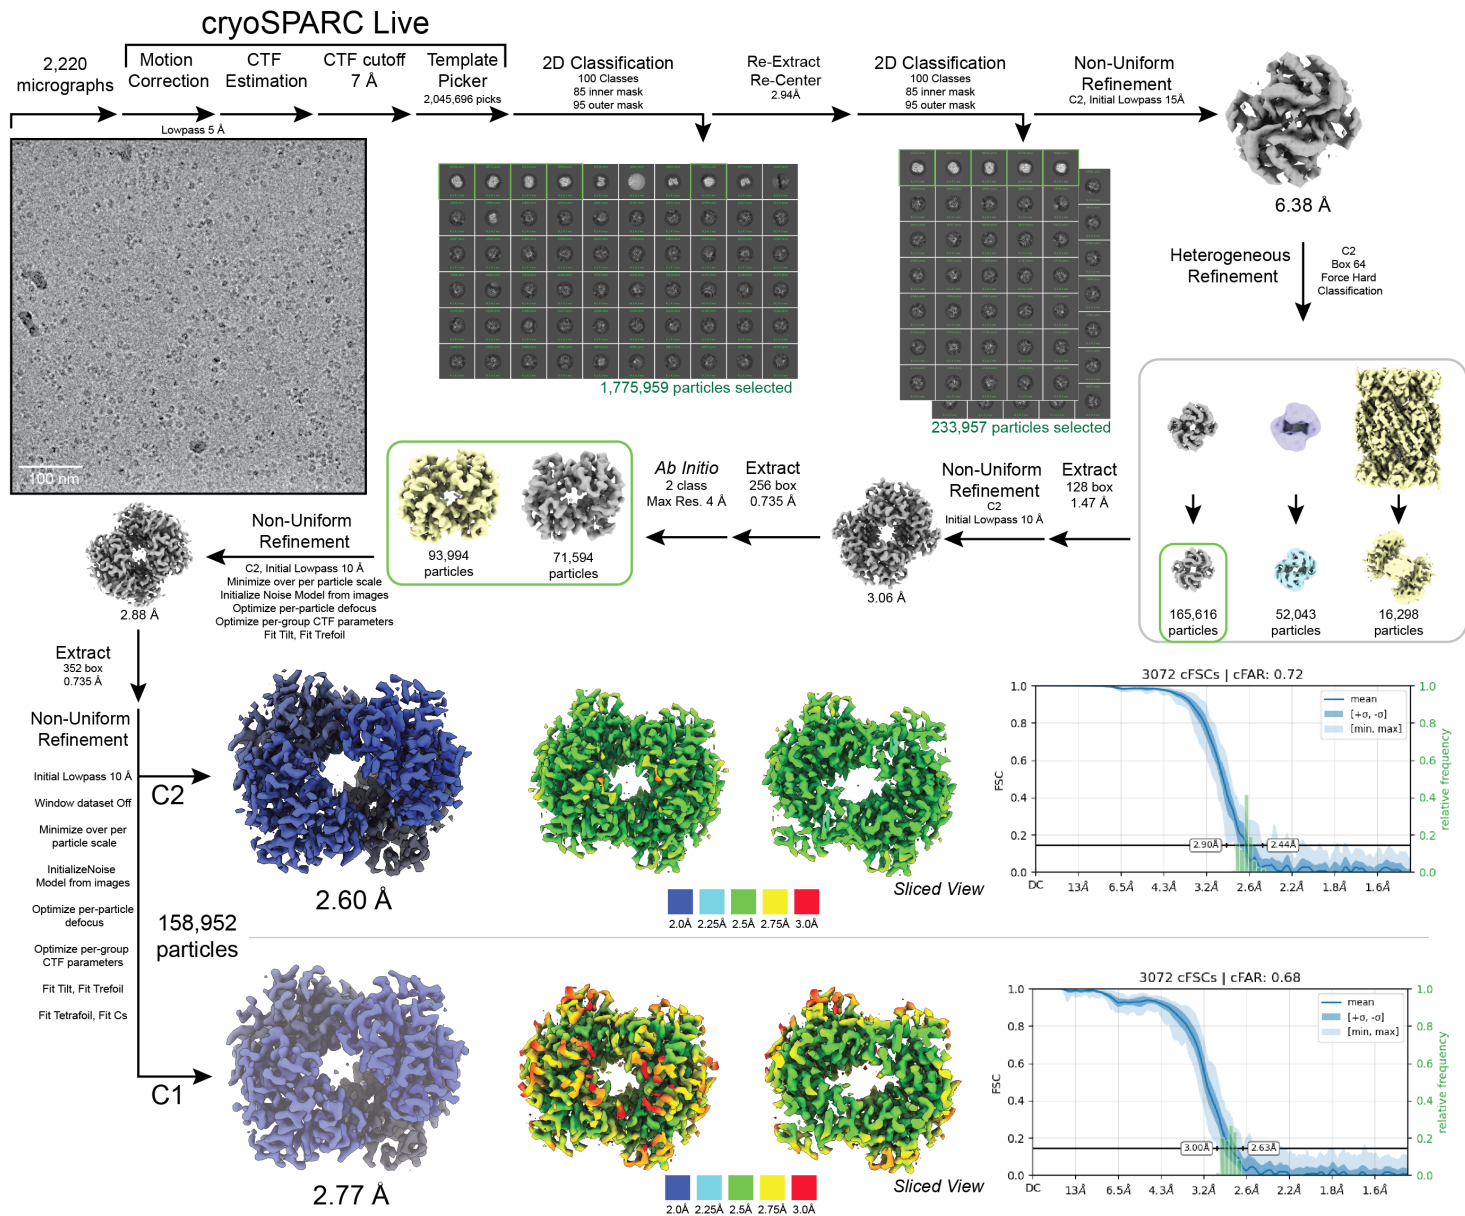

**Figure S8: CryoEM data processing workflow for the high NaDT (60 mM), deoxyHb structure.** Single-particle cryoEM data processing workflow for the 2.60 Å resolution deoxyHb structure that was obtained in 60 mM NaDT under oil. 2,220 micrographs were collected and processed using a similar strategy as the metHb structures in Fig S3. Briefly, particle coordinates were obtained via template picking and extracted downsampled 4x prior to successive rounds of 2-D classification. Particles within the best classes were 3-D refined followed by a heterogeneous refinement using two Hb volumes and the 20S proteasome from *T. thermophilus* (EMDB-4877). Particles in the best class were carried downstream for 3-D refinement without downsampling with per-particle CTF and aberration refinements. For the final refinements, C1 and C2 symmetry were employed. Each of the final structures are colored by local resolution and the 3-D FSC plots are shown.



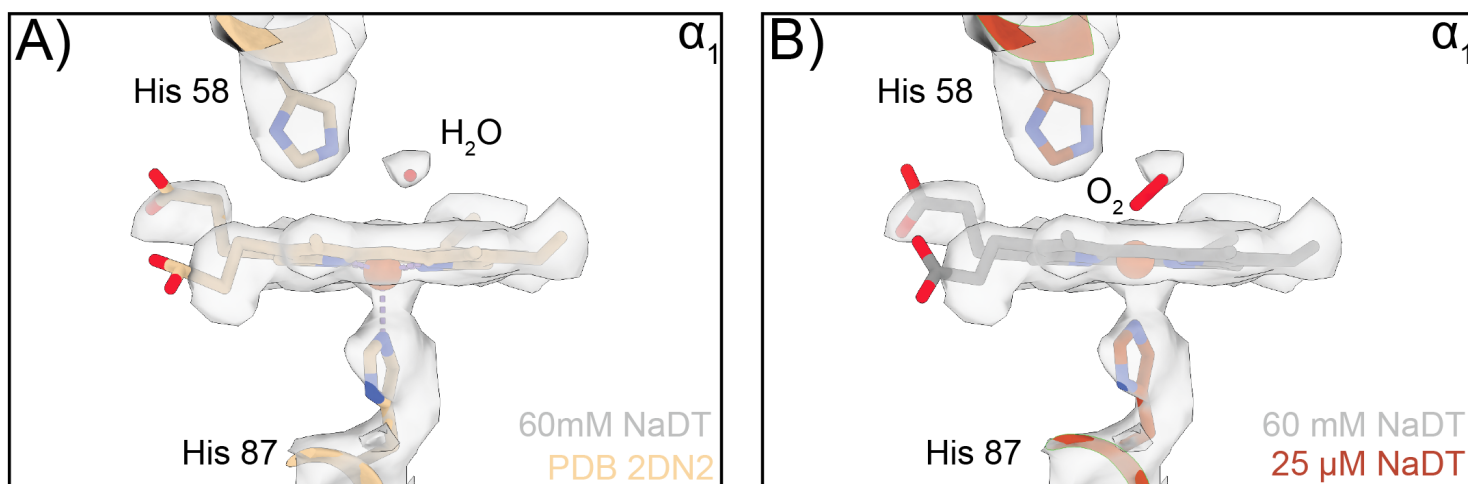

**Figure S9: Water density in the distal pocket of the deoxyHb structure.** **A)** CryoEM density of the 60 mM NaDT deoxyHb structure with the 1.25 Å deoxyHb X-ray atomic model (PDB: 2DN2) docked in place showing a well-defined water molecule above the ferrous unliganded heme of the  $\alpha_1$  subunit. **B)** Same cryoEM density from **(A)** with our oxyHb atomic model docked in showing the poor fit of the oxygen ligand. The atomic models for  $\alpha_1$ H58,  $\alpha_1$ H87 are also shown.



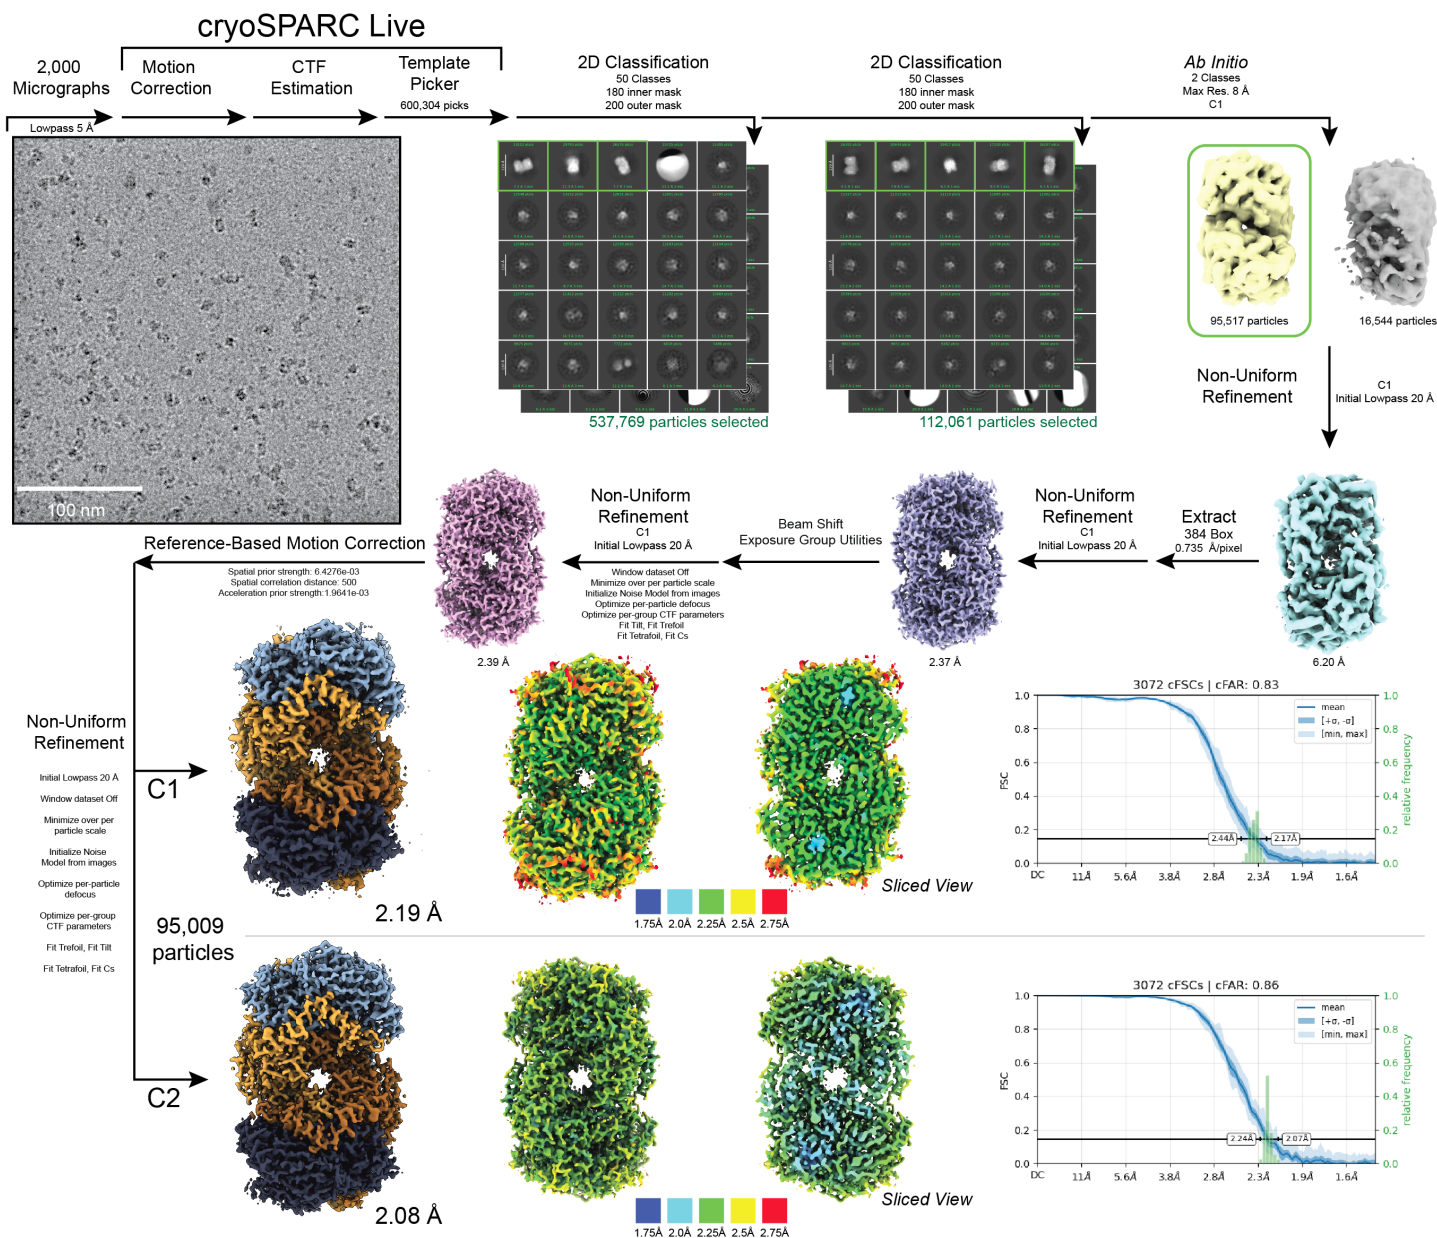

**Figure S11: CryoEM data processing workflow for the reduced ( $P^N$ ) *AvMoFeP* structure.** Single-particle cryoEM data processing workflow for the 2.08 Å resolution reduced ( $P^N$ ) *AvMoFeP* structure that was obtained with the protective oil layer and 20 mM NaDT in the cryoEM buffer. 2,000 micrographs were collected processed using a similar strategy as the oxidized ( $P^{2+}$ ) *MoFeP* structure. For the final refinements, C1 and C2 symmetry were employed. Each of the final structures are colored by local resolution and the 3-D FSC plots are shown.

|                                                     | No Oil Hb    |            | Oil Hb       |            | "No" NaDT    |            | Low NaDT     |            | Partial Oxy Hb |            | DeOxy Hb     |            |
|-----------------------------------------------------|--------------|------------|--------------|------------|--------------|------------|--------------|------------|----------------|------------|--------------|------------|
| <b>Data Collection</b>                              |              |            |              |            |              |            |              |            |                |            |              |            |
| Magnification                                       | 165 kx       |            | 165 kx       |            | 165 kx       |            | 165 kx       |            | 165 kx         |            | 165 kx       |            |
| Voltage (kV)                                        | 300          |            | 300          |            | 300          |            | 300          |            | 300            |            | 300          |            |
| Spherical Aberration (mm)                           | 2.7          |            | 2.7          |            | 2.7          |            | 2.7          |            | 2.7            |            | 2.7          |            |
| Electron Exposure (e <sup>-</sup> /Å <sup>2</sup> ) | 60           |            | 60           |            | 60           |            | 60           |            | 60             |            | 60           |            |
| Defocus range (μm)                                  | -1.0 to -2.5 |            | -1.0 to -2.5 |            | -1.0 to -2.5 |            | -1.0 to -2.5 |            | -1.0 to -2.5   |            | -1.0 to -2.5 |            |
| Pixel size (Å, Physical/Digital)                    | 0.735        |            | 0.735        |            | 0.735        |            | 0.735        |            | 0.735          |            | 0.735        |            |
| Energy Filter Slit Width (eV)                       | 10           |            | 10           |            | 10           |            | 10           |            | 10             |            | 10           |            |
| <b>Map Statistics and Post-Processing</b>           |              |            |              |            |              |            |              |            |                |            |              |            |
| Symmetry imposed                                    | C1           | C2         | C1           | C2         | C1           | C2         | C1           | C2         | C1             | C2         | C1           | C2         |
| Map Resolution (Å)                                  | 3.01         | 2.78       | 2.91         | 2.7        | 2.55         | 2.37       | 2.52         | 2.37       | 2.72           | 2.56       | 2.75         | 2.61       |
| Local resolution range for 75% of voxels            | 7.069        | 6.294      | 6.908        | 5.975      | 6.521        | 5.798      | 6.769        | 5.901      | 6.983          | 5.971      | 7.095        | 6.344      |
| Local resolution range (model)                      | 2.6 - 41.1   | 2.4 - 26.9 | 2.5 - 42.7   | 2.3 - 22.6 | 1.6 - 38.8   | 2.1 - 27.6 | 2.2 - 39.0   | 2.1 - 34.5 | 2.4 - 42.7     | 2.2 - 38.4 | 1.6 - 41.6   | 2.3 - 25.4 |
| Map sharpening B factor (Å <sup>2</sup> )           | 118.3        | 111.9      | 112.3        | 110.2      | 89.2         | 85.9       | 82.7         | 80.5       | 91.9           | 91.1       | 89.5         | 93.4       |
| Map sharpening method                               | Resolve      | Resolve    | Resolve      | Resolve    | Resolve      | Resolve    | Resolve      | Resolve    | Resolve        | Resolve    | Resolve      | Resolve    |
| Q-Score                                             | 0.7          | 0.74       | 0.73         | 0.76       | 0.78         | 0.81       | 0.78         | 0.78       | 0.75           | 0.78       | 0.76         | 0.78       |
| Movies                                              | 2847         | 2847       | 2384         | 2384       | 2475         | 2475       | 1538         | 1538       | 3925           | 3925       | 2220         | 2220       |
| <b>Model Statistics and Validation</b>              |              |            |              |            |              |            |              |            |                |            |              |            |
| Model composition                                   |              |            |              |            |              |            |              |            |                |            |              |            |
| Non-hydrogen atoms                                  | 4543         | 4577       | 4547         | 4584       | 4604         | 4591       | 4853         | 4950       | 4587           | 4862       | 4580         | 4601       |
| Protein                                             | 568          | 568        | 568          | 568        | 568          | 568        | 568          | 568        | 568            | 568        | 568          | 568        |
| Nucleic acids                                       | 0            | 0          | 0            | 0          | 0            | 0          | 0            | 0          | 0              | 0          | 0            | 0          |
| Ligand1                                             | HEM: 4       | HEM: 4     | HEM: 4       | HEM: 4     | HEM: 4       | HEM: 4     | HEM: 4       | HEM: 4     | HEM: 4         | HEM: 4     | HEM: 4       | HEM: 4     |
| Waters                                              | 51           | 85         | 55           | 92         | 104          | 91         | 353          | 450        | 91             | 366        | 88           | 109        |
| R.M.S deviations                                    |              |            |              |            |              |            |              |            |                |            |              |            |
| Length (Å)                                          | 0.004        | 0.039      | 0.033        | 0.005      | 0.047        | 0.022      | 0.003        | 0.003      | 0.024          | 0.003      | 0.024        | 0.039      |
| Angles (°)                                          | 0.602        | 1.496      | 1.215        | 0.934      | 2.128        | 1.218      | 0.512        | 0.531      | 1.331          | 0.673      | 1.466        | 1.940      |
| MolProbity score                                    | 1.24         | 1.27       | 1.30         | 1.36       | 1.30         | 1.18       | 1.36         | 1.48       | 1.23           | 1.27       | 1.18         | 1.19       |
| MolProbity Clashescore                              | 4.72         | 5.06       | 5.61         | 4.60       | 5.50         | 3.93       | 6.06         | 5.38       | 4.49           | 5.16       | 3.93         | 4.04       |
| CaBLAM (% outliers)                                 | 0.91         | 0.93       | 0.73         | 0.72       | 0.75         | 0.73       | 0.54         | 0.72       | 0.36           | 0.72       | 0.55         | 0.74       |
| Rotamer outliers (%)                                | 0.66         | 0.44       | 0.44         | 1.32       | 0.44         | 0.88       | 1.10         | 1.76       | 0.44           | 0.00       | 0.44         | 0.00       |
| Cis peptides (#, %)                                 | 0.0/0.0      | 0.0/0.0    | 0.0/0.0      | 0.0/0.0    | 0.0/0.0      | 0.0/0.0    | 0.0/0.0      | 0.0/0.0    | 0.0/0.0        | 0.0/0.0    | 0.0/0.0      | 0.0/0.0    |
| Ramachandran Plot                                   |              |            |              |            |              |            |              |            |                |            |              |            |
| Favored                                             | 98.92        | 98.18      | 98.74        | 97.86      | 98.72        | 99.82      | 99.29        | 99.64      | 99.28          | 99.11      | 99.1         | 99.46      |
| Allowed                                             | 1.08         | 1.82       | 1.26         | 2.14       | 1.28         | 0.18       | 0.71         | 0.36       | 0.72           | 0.89       | 0.9          | 0.54       |
| Outliers                                            | 0.0          | 0.0        | 0.0          | 0.0        | 0.0          | 0.0        | 0.0          | 0.0        | 0.0            | 0.0        | 0.0          | 0.0        |

**Table 1:** CryoEM data collection and refinement statistics of No Oil, Oil, Very Low NaDT, Low NaDT, Partial Oxy, and DeOxy Hb.

|                                                     | Oxidized MoFeP |            | Reduced MoFeP |            |
|-----------------------------------------------------|----------------|------------|---------------|------------|
| <b>Data Collection</b>                              |                |            |               |            |
| Magnification                                       | 165 kx         |            | 165 kx        |            |
| Voltage (kV)                                        | 300            |            | 300           |            |
| Spherical Aberration (mm)                           | 2.7            |            | 2.7           |            |
| Electron Exposure (e <sup>-</sup> /Å <sup>2</sup> ) | 60             |            | 60            |            |
| Defocus range (μm)                                  | -0.75 to -2.5  |            | -0.75 to -2.5 |            |
| Pixel size (Å, Physical/Digital)                    | 0.735          |            | 0.735         |            |
| Energy Filter Slit Width (eV)                       | 10             |            | 10            |            |
| <b>Map Statistics and Post-Processing</b>           |                |            |               |            |
| Symmetry imposed                                    | C1             | C2         | C1            | C2         |
| Map Resolution (Å)                                  | 2.51           | 2.39       | 2.19          | 2.08       |
| Local resolution range for 75% of voxels            | 6.69           | 6.034      | 6.273         | 5.658      |
| Local resolution range (model)                      | 2.1 - 39.0     | 1.6 - 38.1 | 1.9 - 35.2    | 1.7 - 35.2 |
| Map sharpening B factor (Å <sup>2</sup> )           | 65.2           | 68.3       | 51.0          | 51.8       |
| Map sharpening method                               | Resolve        | Resolve    | Resolve       | Resolve    |
| Q-Score                                             | 0.8            | 0.82       | 0.85          | 0.85       |
| Movies                                              | 2002           | 2002       | 2000          | 2000       |
| <b>Model Statistics and Validation</b>              |                |            |               |            |
| Model composition                                   |                |            |               |            |
| Non-hydrogen atoms                                  | 17271          | 17365      | 17462         | 17763      |
| Protein                                             | 1998           | 1998       | 1998          | 1998       |
| Nucleic acids                                       | 0              | 0          | 0             | 0          |
| Ligand1                                             | ICS: 2         | ICS: 2     | ICS: 2        | ICS: 2     |
| Ligand2                                             | CLF: 2         | CLF: 2     | CLF: 2        | CLF: 2     |
| Ligand3                                             | HCA: 2         | HCA: 2     | HCA: 2        | HCA: 2     |
| Ligand4                                             | FE: 2          | FE: 2      | FE: 2         | FE: 2      |
| Waters                                              | 1244           | 1338       | 1435          | 1736       |
| R.M.S deviations                                    |                |            |               |            |
| Length (Å)                                          | 0.003          | 0.004      | 0.002         | 0.003      |
| Angles (°)                                          | 0.509          | 0.586      | 0.497         | 0.560      |
| MolProbity score                                    | 1.66           | 1.59       | 1.40          | 1.82       |
| MolProbity Clashscore                               | 6.85           | 9.63       | 6.41          | 14.96      |
| CaBLAM (% outliers)                                 | 0.61           | 0.76       | 0.55          | 0.71       |
| Rotamer outliers (%)                                | 1.57           | 1.04       | 1.04          | 0.81       |
| Cis peptides (#, %)                                 | 6.5/0.1        | 6.5/0.1    | 6.5/0.1       | 6.5/0.1    |
| Ramachandran Plot                                   |                |            |               |            |
| Favored                                             | 97.29          | 97.69      | 97.84         | 97.24      |
| Allowed                                             | 2.71           | 2.31       | 2.16          | 2.76       |
| Outliers                                            | 0.0            | 0.0        | 0.0           | 0.0        |

**Table 2:** CryoEM data collection and refinement statistics of Oxidized and Reduced MoFeP
